# Supplementary material for: Eu(iii) dithiocarbamate complex and N-p-tolylsulfonylphenylalanine as a novel chiral catalyst for the asymmetric synthesis of cyanohydrins
Source: Royal Society of Chemistry journal article supplement (doi:10.1039/b607741m), 2006-01-01

Fluorescence spectra of solutions from addition of the 0, 1, 2 and 3 equivalents of N-tosylated aminoacid to solution of the Eu dithiocarbamate complex.

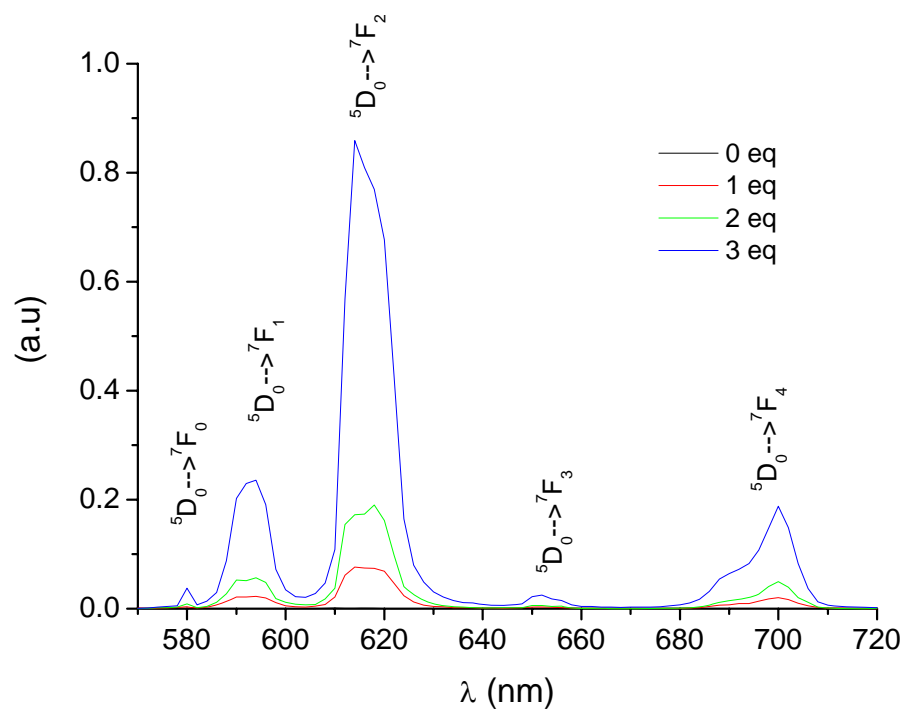

Supplement: b607741m1.pdf [file b607741m1.pdf]
