# Supplementary material for: Eu(iii) dithiocarbamate complex and N-p-tolylsulfonylphenylalanine as a novel chiral catalyst for the asymmetric synthesis of cyanohydrins
Source: Royal Society of Chemistry journal article supplement (doi:10.1039/b607741m), 2006-01-01

Juliana Alves  
Amostra J0207\_1  
Solicitacao M. L0525\_1  
25.05.06 UFPE

Pulse Sequence: zgpg30

Solvent: CDCl3  
Temp. 50.0 C / 323.1 K  
UNITYplus-300 "UFPEu300"

Pulse 65.0 degrees  
Acq. time 3.744 sec.  
Width 5000.0 Hz  
18 repetitions  
OBSERVE F1, 281.953661 MHz  
DATA PROCESSING  
F1 size 65536  
Total time 1 min, 0 sec

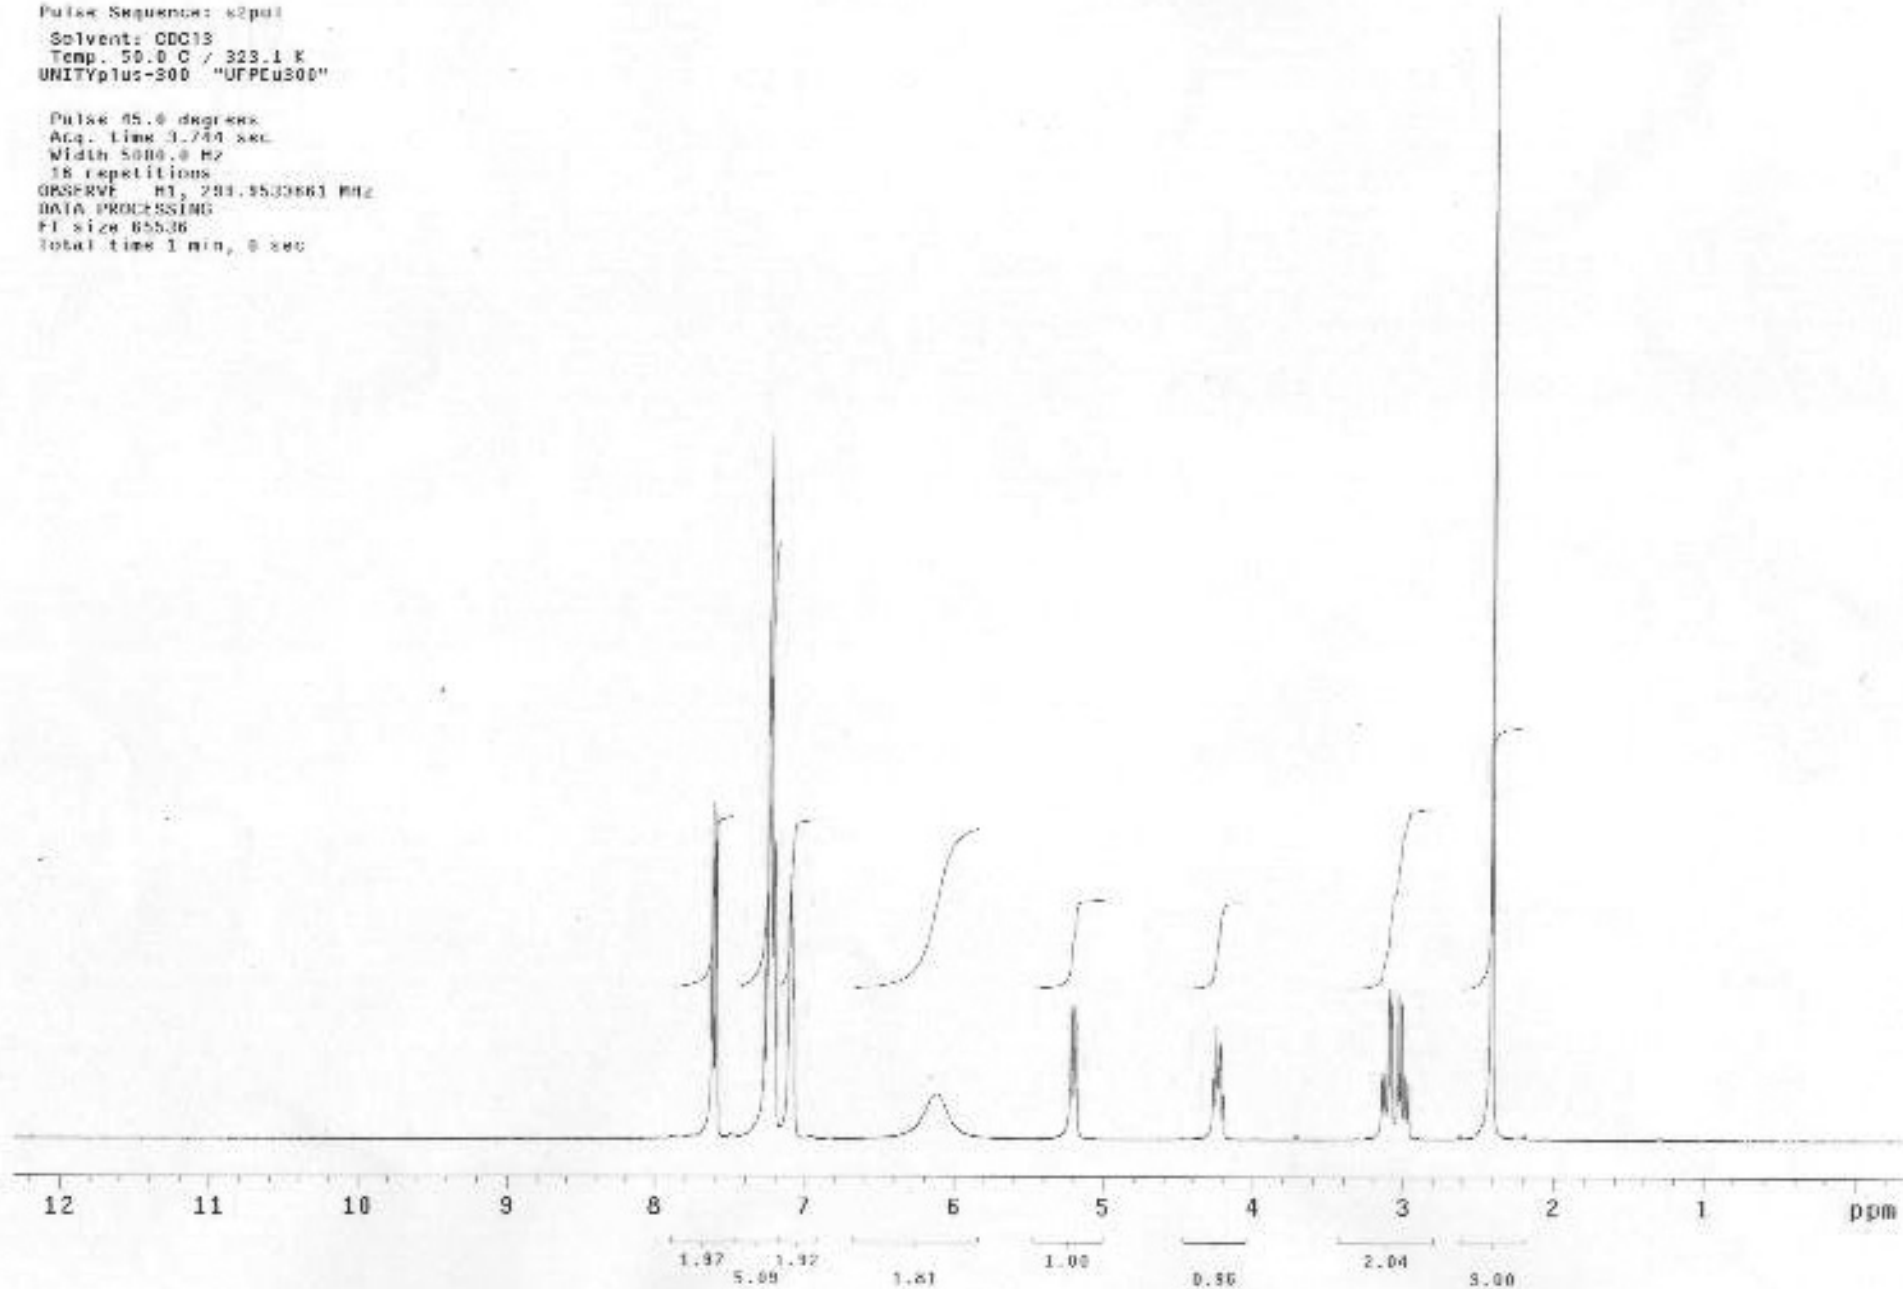

Supplement: b607741m2.pdf [file b607741m2.pdf]
