# Supplementary material for: Eu(iii) dithiocarbamate complex and N-p-tolylsulfonylphenylalanine as a novel chiral catalyst for the asymmetric synthesis of cyanohydrins
Source: Royal Society of Chemistry journal article supplement (doi:10.1039/b607741m), 2006-01-01

Juliana Alves  
Amostra J0207.1  
Solicitação N. 10525\_1  
25.05.06 UFPE

Pulse Sequence: zgpg30

Solvent: CDCl3  
Temp. 50.0 C / 323.1 K  
UNITYplus-300 "UFPE0300"

Relax. delay 1.500 sec  
Pulse 45.0 degrees  
Acq. time 2.500 sec  
Width 16501.7 Hz  
160 repetitions  
OBSERVE C13, 75.4233513 MHz  
DECOUPLE H1, 299.9548653 MHz  
Power 35 dB  
on during acquisition  
off during delay  
WALTZ-16 modulated  
DATA PROCESSING  
Line broadening 1.0 Hz  
FT size 131072  
Total time 1 hr, 8 min, 27 sec.

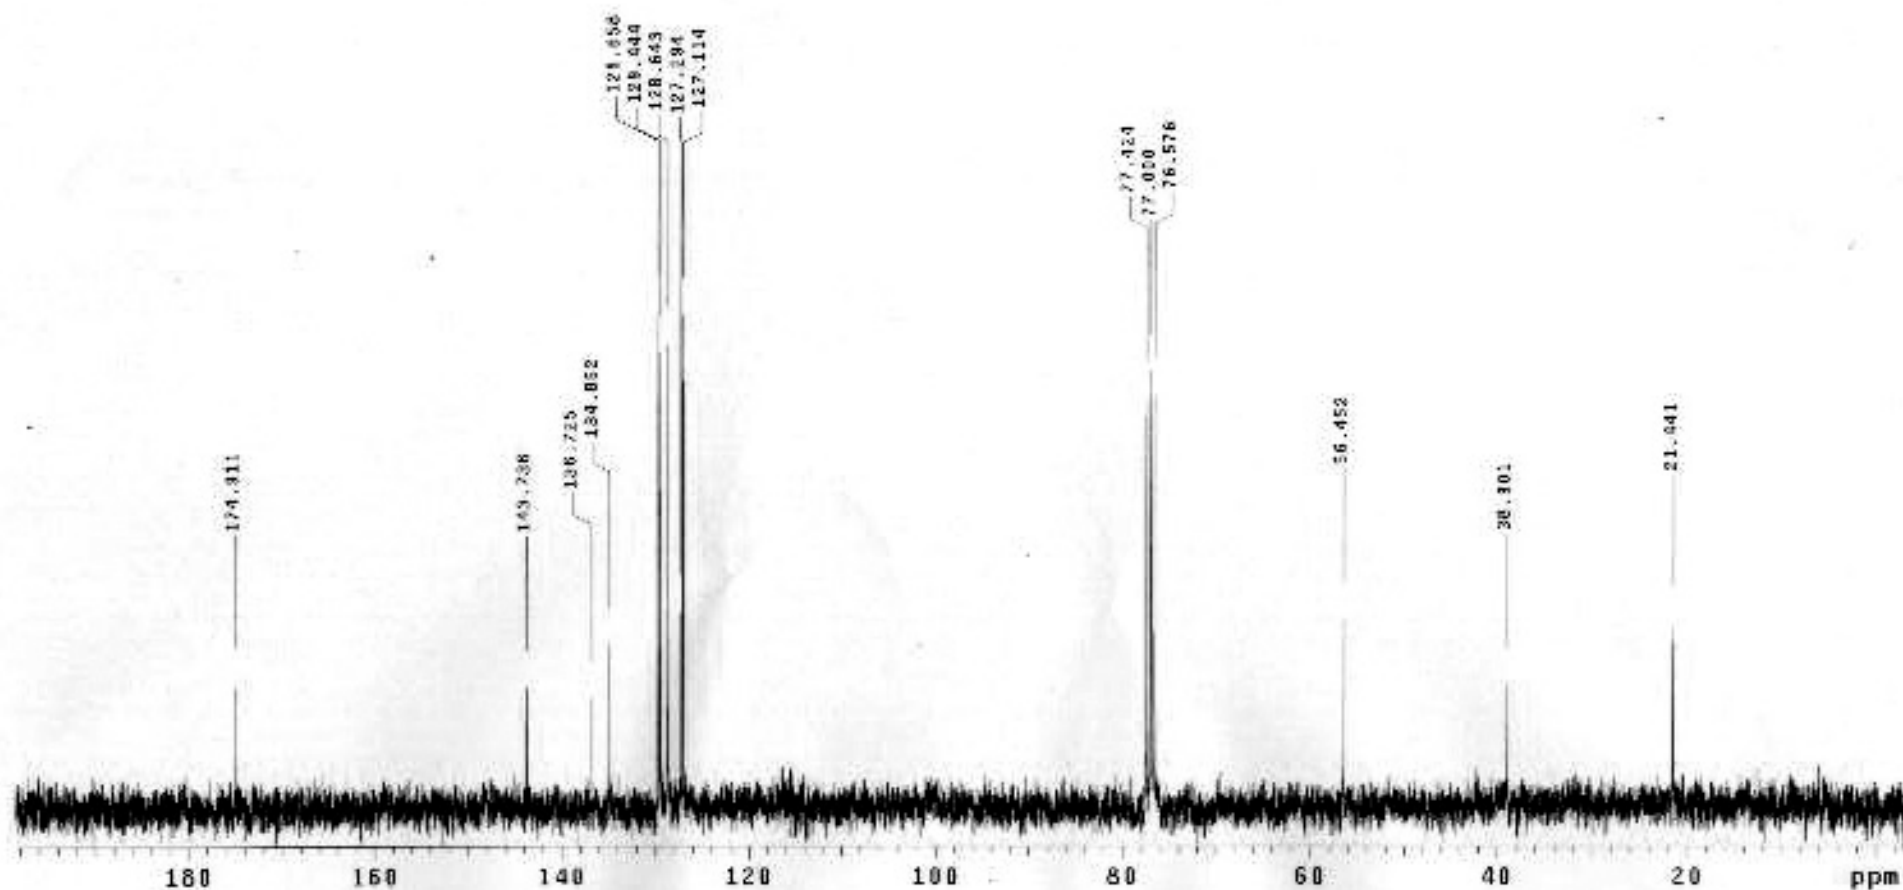

Supplement: b607741m3.pdf [file b607741m3.pdf]
